# Supplementary material for: Spheroid arrays for high-throughput single-cell analysis of spatial patterns and biomarker expression in 3D
Source: PubMed Central journal article supplement (PMC5278392; doi:10.1038/srep41160), 2017-01-30
Supplement: srep41160-s1.pdf [file srep41160-s1.pdf]

# Spheroid arrays for high-throughput single-cell analysis of spatial patterns and biomarker expression in 3D

## **Authors:**

**\*Delyan P. Ivanov<sup>a</sup>, Anna M. Grabowska<sup>a</sup>**

a- Cancer Biology, Division of Cancer and Stem Cells, School of Medicine, Queen's Medical Centre, University of Nottingham, Nottingham, UK

**\*Correspondence to :** [delyan.ivanov@nottingham.ac.uk](mailto:delyan.ivanov@nottingham.ac.uk), Delyan Ivanov, Cancer Biology, Division of Cancer and Stem Cells, Queen's Medical Centre, University of Nottingham, Nottingham NG7 2UH, UK

Telephone: +44 (0) 115 8231135

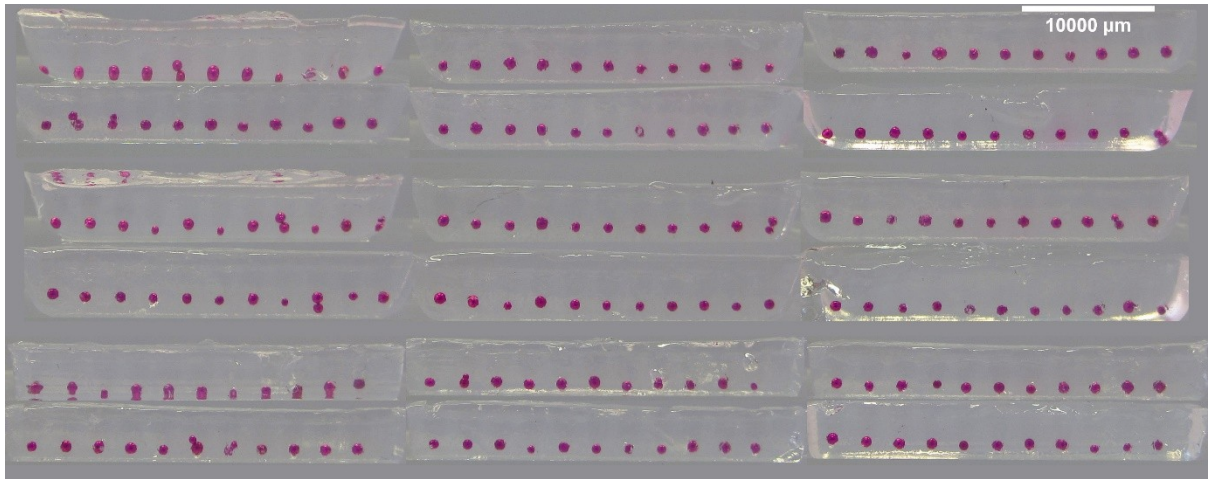

**Supplementary Figure 1.** Cross-section photographs of three microarray molds. Magenta-colored plastic beads ( $r=500\mu\text{m}$ ) were embedded in three separate arrays. The arrays were sectioned along each row, photographed and combined in a single image.

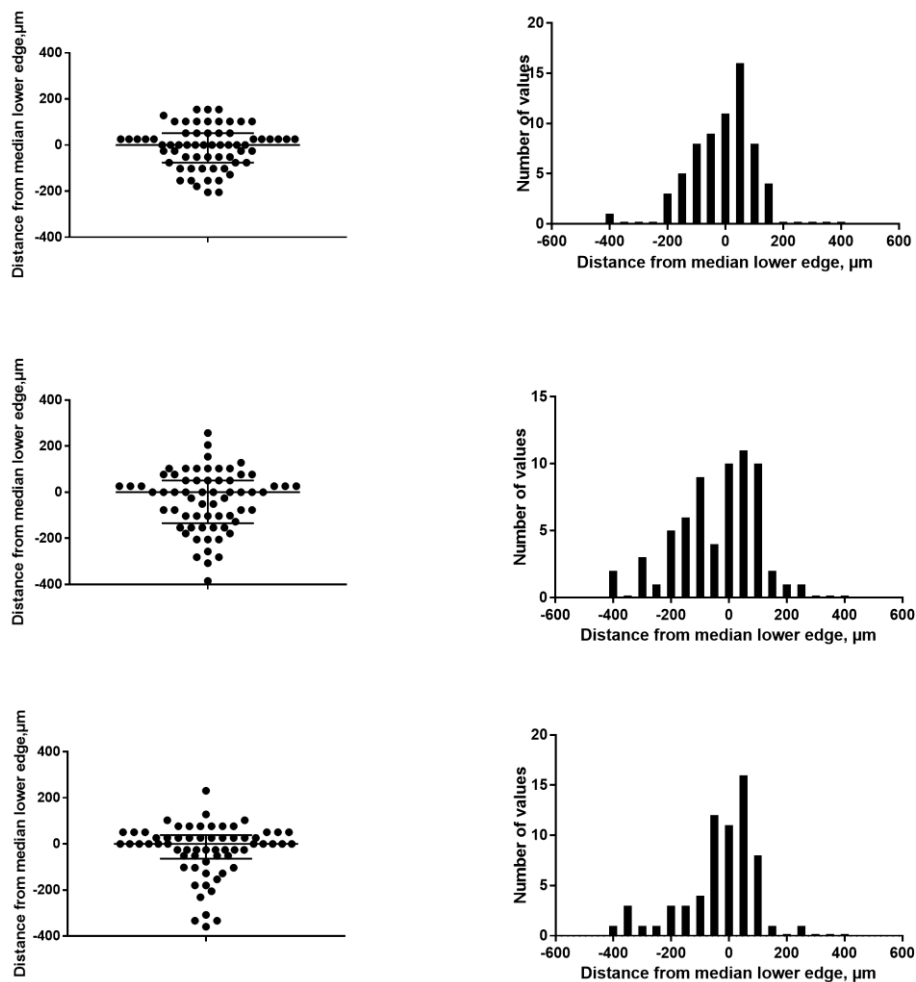

**Supplementary Figure 2.** Uniformity of embedding depth for three arrays. Left panels- Distribution of the distance from the median lower edge for each bead from three independent experiments. Line is median, bars represent the interquartile range. Right panels- frequency plot of distance from the median lower edge for the corresponding experiments.

The [Supplementary Design file](#) to print the arrays, [Supplementary macro 1](#) for cytoplasmic images, [Supplementary macro 2](#) for nuclear stains and [Supplementary macro 3](#) to correct uneven background illumination are available to download from the Figshare open database.

Supplementary design file DOI: 10.6084/m9.figshare.4269173

Supplementary macro 1 DOI: 10.6084/m9.figshare.4269194

Supplementary macro 2 DOI: 10.6084/m9.figshare.4269191

Supplementary macro 3 DOI: 10.6084/m9.figshare.4269185
